# Supplementary material
Source: PubMed Central journal article supplement (PMC2746766)

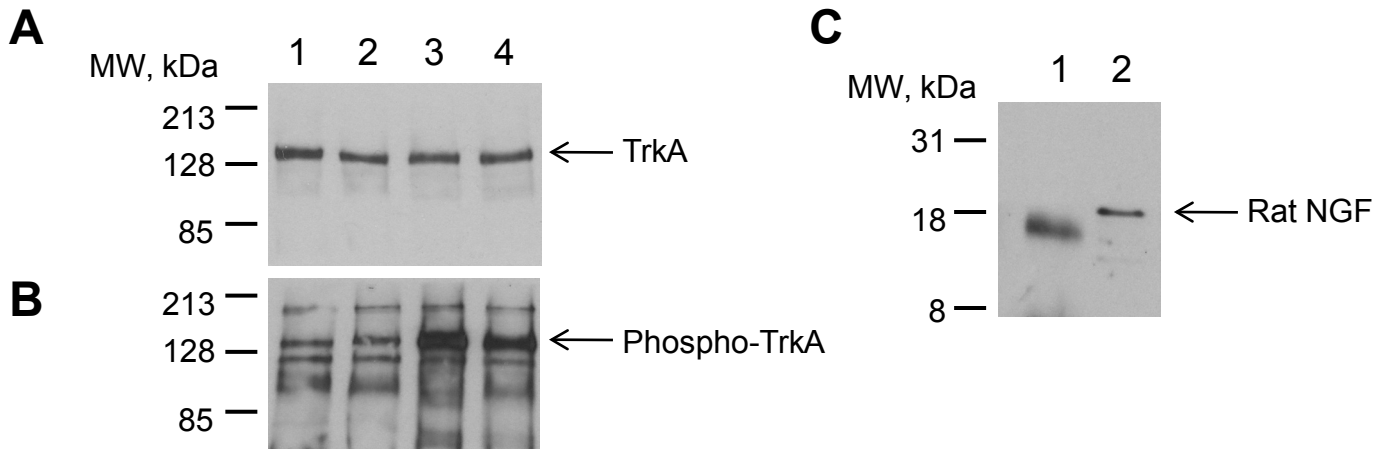

**Figure 1S**  
**Conti et al**

Supplement: NIHMS135674-supplement-01.pdf [file NIHMS135674-supplement-01.pdf]

# Perirhinal Cortex

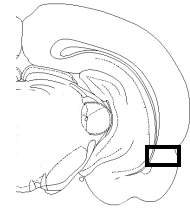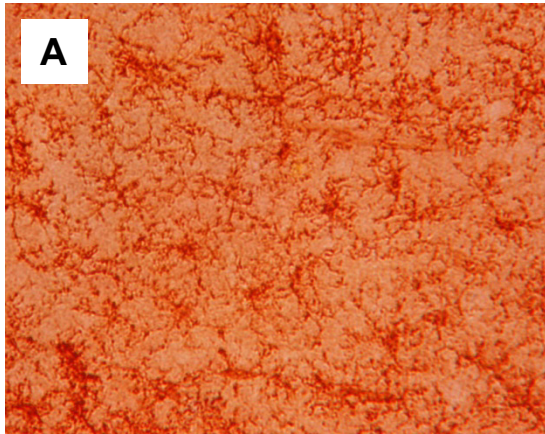

Sham ECS

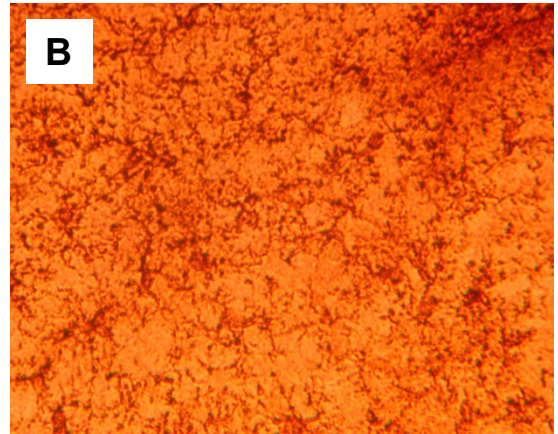

Chronic ECS

**Figure 2S**  
Conti et al

Supplement: NIHMS135674-supplement-02.pdf [file NIHMS135674-supplement-02.pdf]
